# Supplementary material
Source: PubMed Central journal article supplement (PMC4688200)

Figure S1.

microaggregates, XH001+TM7x, t=24hrs

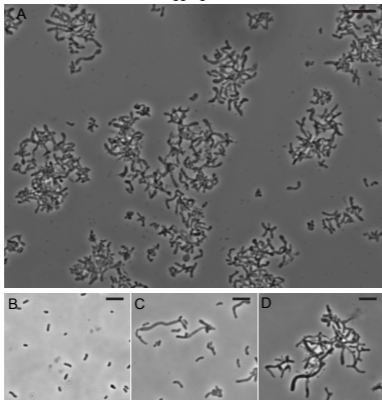

Supplement: NIHMS740602-supplement-248_2015_711_MOESM2_ESM.pdf [file NIHMS740602-supplement-248_2015_711_MOESM2_ESM.pdf]

Figure S2.

19.7% O<sub>2</sub> and 5% CO<sub>2</sub>  
XH001

20.9% O<sub>2</sub> and 0% CO<sub>2</sub>

XH001

XH001/TM7x

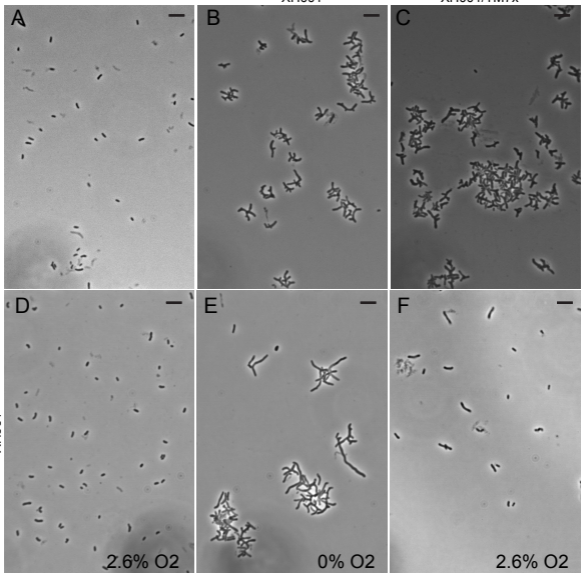

Supplement: NIHMS740602-supplement-248_2015_711_MOESM3_ESM.pdf [file NIHMS740602-supplement-248_2015_711_MOESM3_ESM.pdf]

Figure S3.

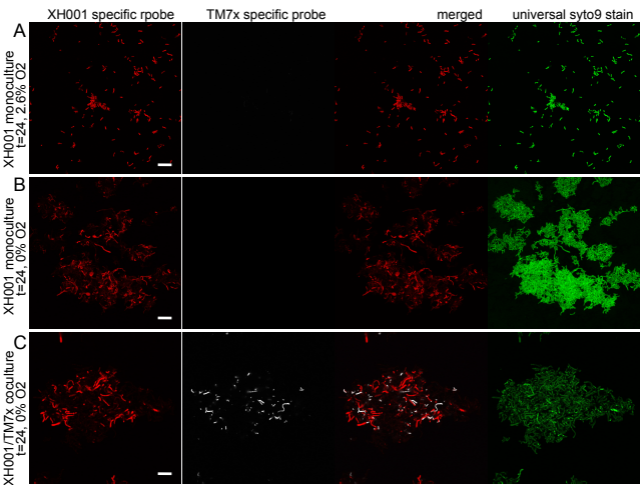

Supplement: NIHMS740602-supplement-248_2015_711_MOESM4_ESM.pdf [file NIHMS740602-supplement-248_2015_711_MOESM4_ESM.pdf]
